# Supplementary material
Source: MDPI journal article supplement (https://www.mdpi.com/2076-3417/12/13/6521)
Supplement: s1 [file s1]

**Table S1.** The complete optimal measurement configurations of RPRQ.

| States number | CN    | EWV     | Parameters | Measurement configuration          |
|---------------|-------|---------|------------|------------------------------------|
| 4             | 1.732 | 10.0000 | $\theta_P$ | 4.87°, 85.13°, 94.87°, 175.13°     |
|               |       |         | $\theta_Q$ | 22.50°, 67.50°, 112.50°, 157.50°   |
| 4             | 1.732 | 10.0000 | $\theta_P$ | 130.13°, 139.87°, 40.13°, 49.87°   |
|               |       |         | $\theta_Q$ | 112.50°, 157.50°, 22.50°, 67.50°   |
| 6             | 1.732 | 6.6667  | $\theta_P$ | 173.33°, 83.33°, 13.38°            |
|               |       |         |            | 103.38°, 21.05°, 111.05°           |
|               |       |         | $\theta_Q$ | 71.36°, 71.36°, 112.27°            |
|               |       |         |            | 112.27°, 50.79°, 50.79°            |
| 8             | 1.732 | 5.0000  | $\theta_P$ | 19.27°, 109.27°, 163.89°, 73.89°   |
|               |       |         |            | 26.08°, 116.08°, 118.57°, 28.57°   |
|               |       |         | $\theta_Q$ | 180.00°, 180.00°, 179.88°, 179.88° |
|               |       |         |            | 43.76°, 43.76°, 136.09°, 136.09°   |
| 12            | 1.732 | 3.3333  | $\theta_P$ | 46.92°, 136.92°, 102.83°, 12.83°   |
|               |       |         |            | 4.54°, 94.54°, 146.56°, 56.56°     |
|               |       |         |            | 176.18°, 86.18°, 60.80°, 150.80°   |
|               |       |         | $\theta_Q$ | 45.35°, 45.35°, 13.72°, 13.72°     |
|               |       |         |            | 33.12°, 33.12°, 164.76°, 164.76°   |
|               |       |         |            | 115.58°, 115.58°, 74.31°, 74.31°   |
| 20            | 1.732 | 2.0000  | $\theta_P$ | 33.35°, 123.35°, 51.91°, 141.91°   |
|               |       |         |            | 154.76°, 64.76°, 55.82°, 145.82°   |
|               |       |         |            | 73.12°, 163.12°, 5.47°, 95.47°     |
|               |       |         |            | 80.46°, 170.46°, 122.53°, 32.53°   |
|               |       |         |            | 61.30°, 151.30°, 178.19°, 88.19°   |
|               |       |         | $\theta_Q$ | 93.68°, 93.68°, 139.00°, 139.00°   |
|               |       |         |            | 101.27°, 101.27°, 38.19°, 38.19°   |
|               |       |         |            | 137.54°, 137.54°, 89.00°, 89.00°   |
|               |       |         |            | 65.76°, 65.76°, 114.68°, 114.68°   |
|               |       |         |            | 73.47°, 73.47°, 101.27°, 101.27°   |

**Table S2.** The complete optimal measurement configurations of FPRHRQ.

| States number | CN    | EWV     | Parameters | Measurement configuration          |
|---------------|-------|---------|------------|------------------------------------|
| 4             | 1.732 | 10.0000 | $\theta_P$ | 0°                                 |
|               |       |         | $\theta_H$ | 2.433°, 42.567°, 137.433°, 87.567° |
|               |       |         | $\theta_Q$ | 22.50°, 67.50°, 112.50°, 157.50°   |
| 4             | 1.732 | 10.0000 | $\theta_P$ | 0°                                 |
|               |       |         | $\theta_H$ | 47.433°, 177.567°, 2.433°, 42.567° |
|               |       |         | $\theta_Q$ | 22.50°, 67.50°, 112.50°, 157.50°   |
| 6             | 1.732 | 6.6667  | $\theta_P$ | 0°                                 |
|               |       |         | $\theta_H$ | 86.665°, 41.665°, 6.69°            |
|               |       |         |            | 51.69°, 10.525°, 55.525°           |
|               |       |         | $\theta_Q$ | 71.36°, 71.36°, 112.27°            |
| 8             | 1.732 | 5.0000  |            | 112.27°, 50.79°, 50.79°            |
|               |       |         | $\theta_P$ | 0°                                 |
|               |       |         | $\theta_H$ | 171.46°, 36.46°, 0.33°, 45.44°     |
|               |       |         |            | 129.11°, 174.11°, 160.58°, 25.58°  |
| 12            | 1.732 | 3.3333  | $\theta_Q$ | 155.71°, 155.71°, 8.14°, 8.14°     |
|               |       |         |            | 127.84°, 127.84°, 36.82°, 36.82°   |
|               |       |         | $\theta_P$ | 0°                                 |
|               |       |         | $\theta_H$ | 23.46°, 68.46°, 51.415°, 6.415°    |
| 12            | 1.732 | 3.3333  |            | 2.27°, 47.27°, 73.28°, 28.28°      |
|               |       |         |            | 88.09°, 43.09°, 30.40°, 75.40°     |
|               |       |         | $\theta_Q$ | 45.35°, 45.35°, 13.72°, 13.72°     |
|               |       |         |            | 33.12°, 33.12°, 164.76°, 164.76°   |
| 20            | 1.732 | 2.0000  |            | 115.58°, 115.58°, 74.31°, 74.31°   |
|               |       |         | $\theta_P$ | 0°                                 |
|               |       |         | $\theta_H$ | 16.675°, 61.675°, 25.955°, 70.955° |
|               |       |         |            | 77.38°, 32.38°, 27.91°, 72.91°     |
| 20            | 1.732 | 2.0000  |            | 36.56°, 81.56°, 2.735°, 47.735°    |
|               |       |         |            | 40.23°, 85.23°, 61.265°, 16.265°   |
|               |       |         |            | 30.65°, 75.65°, 89.095°, 44.095°   |
|               |       |         | $\theta_Q$ | 93.68°, 93.68°, 139.00°, 139.00°   |
| 20            | 1.732 | 2.0000  |            | 101.27°, 101.27°, 38.19°, 38.19°   |
|               |       |         |            | 137.54°, 137.54°, 89.00°, 89.00°   |
|               |       |         |            | 65.76°, 65.76°, 114.68°, 114.68°   |
|               |       |         |            | 73.47°, 73.47°, 101.27°, 101.27°   |

**Table S3.** The complete optimal measurement configurations of FPDFVR.

| States number | CN    | EWV     | Parameters    | Measurement configuration                                                                                                                                                            |
|---------------|-------|---------|---------------|--------------------------------------------------------------------------------------------------------------------------------------------------------------------------------------|
| 4             | 1.732 | 10.0000 | $\theta_P$    | 0°                                                                                                                                                                                   |
|               |       |         | $\theta_{F1}$ | 45°                                                                                                                                                                                  |
|               |       |         | $\theta_{F2}$ | 0°                                                                                                                                                                                   |
|               |       |         | $\delta_{F1}$ | 305.26°, 234.74°, 125.26°, 54.74°                                                                                                                                                    |
|               |       |         | $\delta_{F2}$ | 225.00°, 315.00°, 315.00°, 225.00°                                                                                                                                                   |
| 4             | 1.732 | 10.0000 | $\theta_P$    | 0°                                                                                                                                                                                   |
|               |       |         | $\theta_{F1}$ | 45°                                                                                                                                                                                  |
|               |       |         | $\theta_{F2}$ | 0°                                                                                                                                                                                   |
|               |       |         | $\delta_{F1}$ | 234.74°, 305.26°, 54.74°, 125.26°                                                                                                                                                    |
|               |       |         | $\delta_{F2}$ | 45.00°, 135.00°, 135.00°, 45.00°                                                                                                                                                     |
| 6             | 1.732 | 6.6667  | $\theta_P$    | 0°                                                                                                                                                                                   |
|               |       |         | $\theta_{F1}$ | 45°                                                                                                                                                                                  |
|               |       |         | $\theta_{F2}$ | 0°                                                                                                                                                                                   |
|               |       |         | $\delta_{F1}$ | 242.82°, 62.82°, 42.10°<br>222.10°, 60.61°, 240.61°                                                                                                                                  |
|               |       |         | $\delta_{F2}$ | 86.17°, 86.17°, 321.54°,<br>321.54°, 192.98°, 192.98°                                                                                                                                |
| 8             | 1.732 | 5.0000  | $\theta_P$    | 0°                                                                                                                                                                                   |
|               |       |         | $\theta_{F1}$ | 45°                                                                                                                                                                                  |
|               |       |         | $\theta_{F2}$ | 0°                                                                                                                                                                                   |
|               |       |         | $\delta_{F1}$ | 105.04°, 285.04°, 292.52°, 112.52°<br>290.75°, 110.75°, 355.45°, 175.45°                                                                                                             |
|               |       |         | $\delta_{F2}$ | 185.96°, 185.96°, 66.94°, 66.94°<br>304.06°, 304.06°, 198.52°, 198.52°                                                                                                               |
| 12            | 1.732 | 3.3333  | $\theta_P$    | 0°                                                                                                                                                                                   |
|               |       |         | $\theta_{F1}$ | 45°                                                                                                                                                                                  |
|               |       |         | $\theta_{F2}$ | 0°                                                                                                                                                                                   |
|               |       |         | $\delta_{F1}$ | 119.07°, 299.07°, 280.01°, 100.01°<br>158.68°, 338.68°, 277.79°, 97.79°<br>303.15°, 123.15°, 137.78°, 317.78°                                                                        |
|               |       |         | $\delta_{F2}$ | 90.70°, 90.70°, 322.56°, 322.56°<br>359.78°, 359.78°, 26.79°, 26.79°<br>257.87°, 257.87°, 172.16°, 172.16°                                                                           |
| 20            | 1.732 | 2.0000  | $\theta_P$    | 0°                                                                                                                                                                                   |
|               |       |         | $\theta_{F1}$ | 45°                                                                                                                                                                                  |
|               |       |         | $\theta_{F2}$ | 0°                                                                                                                                                                                   |
|               |       |         | $\delta_{F1}$ | 285.28°, 105.28°, 45.09°, 225.09°<br>133.50°, 313.50°, 91.54°, 271.54°<br>182.82°, 2.82°, 92.22°, 272.22°<br>234.03°, 54.03°, 44.74°, 224.74°<br>48.43°, 228.43°, 267.61°, 87.61°    |
|               |       |         | $\delta_{F2}$ | 11.04°, 11.04°, 144.63°, 144.63°<br>254.46°, 254.46°, 233.89°, 233.89°<br>359.72°, 359.72°, 148.32°, 148.32°<br>8.27°, 8.27°, 234.21°, 234.21°<br>300.83°, 300.83°, 100.88°, 100.88° |
